# Supplementary material for: Cudraxanthone D Ameliorates Psoriasis-like Skin Inflammation in an Imiquimod-Induced Mouse Model via Inhibiting the Inflammatory Signaling Pathways
Source: MDPI journal article supplement (doi:10.3390/molecules26196086), 2021-10-08
Supplement: s1 [file s1]

# **Cudraxanthone D ameliorates the psoriasis-like skin inflammation in an imiquimod-induced mouse model via inhibiting the inflammatory signaling pathways**

Namkyung Kim <sup>1</sup>, Soyoung Lee <sup>2</sup>, Jinjoo Kang <sup>1</sup>, Young-Ae Choi <sup>1</sup>, Yong Hyun Jang <sup>3,\*</sup>, Gil-Saeng Jeong <sup>4,\*</sup>, Sang-Hyun Kim <sup>1,\*</sup>

<sup>1</sup> Cell & Matrix Research Institute, Department of Pharmacology, School of Medicine, Kyungpook National University, Daegu 41944, Republic of Korea; nortonnklab@gmail.com (N.K.); jinjoo1kang@gmail.com (J.K.); korrry@hanmail.net (Y.-A.C.); shkim72@knu.ac.kr (S.-H.K)

<sup>2</sup> Immunoregulatory Materials Research Center, Korea Research Institute of Bioscience and Biotechnology, Jeongeup 28116, Republic of Korea; sylee@kribb.re.kr (S.L.)

<sup>3</sup> Departments of Dermatology, School of Medicine, Kyungpook National University, Daegu 41944, Republic of Korea; yhjang@knu.ac.kr (Y.H.J)

<sup>4</sup> College of Pharmacy, Chungnam National University, Daejeon 34134, Republic of Korea; gsjeong@cnu.ac.kr (G.-S.J)

\*Correspondence: shkim72@knu.ac.kr (S.-H.K.), yhjang@knu.ac.kr (Y.H.J), gsjeong@cnu.ac.kr (G.-S.J)

## Supplementary material and method

### *Protein extraction from IMQ-induced mice skin*

At the mice sacrificed, mice skin was gathered in RIPA buffer (Biosesang) containing a protease/phosphatase inhibitor mixture (Roche). Next, mice skin was homogenized by a TissueLyser II (Qiagene). The tissue lysates were centrifuged at 1,200 g for 15 min at 4°C, and supernatant was collected. The protein quantification assay was performed with the Bradford Protein assay kit (Bio-Rad Laboratories) and loaded onto 10% sodium dodecyl sulfate polyacrylamide gel electrophoresis, and then transferred onto nitrocellulose membranes (Pall Life science). After transference, membranes were observed with Ponceau S stain. Immunodetection was carried out using SuperSignal West Pico Chemiluminescent Substrate (Thermo Fisher Scientific) by G:BOX Chemi XRQ (Syngene).

**Figure S3. Effects of CD on the total and phosphorylated form of STAT1 and NF-κB in mouse skin.**

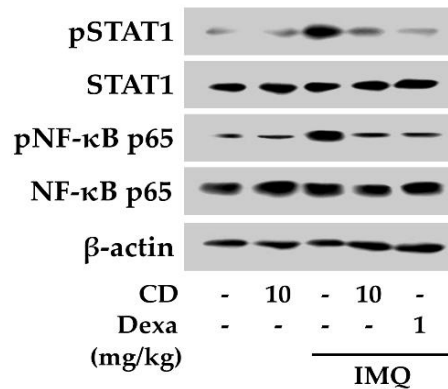

After the *in vivo* experiments, the mice were sacrificed, and their skins were obtained. Activation of STAT1 and NF-κB in IMQ-induced skin was detected via Western blot. The loading control was confirmed using β-actin in independent blots from three randomly-selected skin tissue per each group. CD: Cudraxanthone D, Dexa: dexamethasone.
