# Supplementary material for: Cudraxanthone D Ameliorates Psoriasis-like Skin Inflammation in an Imiquimod-Induced Mouse Model via Inhibiting the Inflammatory Signaling Pathways
Source: MDPI journal article supplement (doi:10.3390/molecules26196086), 2021-10-08
Supplement: s1 [file s1]

# **Cudraxanthone D ameliorates the psoriasis-like skin inflammation in an imiquimod-induced mouse model via inhibiting the inflammatory signaling pathways**

Namkyung Kim <sup>1</sup>, Soyoung Lee <sup>2</sup>, Jinjoo Kang <sup>1</sup>, Young-Ae Choi <sup>1</sup>, Yong Hyun Jang <sup>3,\*</sup>, Gil-Saeng Jeong <sup>4,\*</sup>, Sang-Hyun Kim <sup>1,\*</sup>

<sup>1</sup> Cell & Matrix Research Institute, Department of Pharmacology, School of Medicine, Kyungpook National University, Daegu 41944, Republic of Korea; nortonnklab@gmail.com (N.K.); jinjoo1kang@gmail.com (J.K.); korrry@hanmail.net (Y.-A.C.); shkim72@knu.ac.kr (S.-H.K)

<sup>2</sup> Immunoregulatory Materials Research Center, Korea Research Institute of Bioscience and Biotechnology, Jeongeup 28116, Republic of Korea; sylee@kribb.re.kr (S.L.)

<sup>3</sup> Departments of Dermatology, School of Medicine, Kyungpook National University, Daegu 41944, Republic of Korea; yhjang@knu.ac.kr (Y.H.J)

<sup>4</sup> College of Pharmacy, Chungnam National University, Daejeon 34134, Republic of Korea; gsjeong@cnu.ac.kr (G.-S.J)

\*Correspondence: shkim72@knu.ac.kr (S.-H.K.), yhjang@knu.ac.kr (Y.H.J), gsjeong@cnu.ac.kr (G.-S.J)

**Figure S2. Effect of CD on TLR7 in mouse skin.**

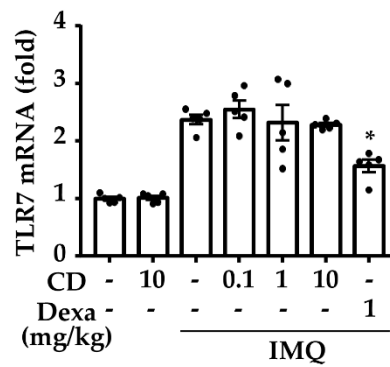

The qPCR analysis of TLR7 expression levels in dorsal skin of IMQ-induced psoriasis mouse model. CD did not reduce the TLR7 expression. The graph shows relative fold expression of mRNA normalized GAPDH. Each data point represents the Mean  $\pm$  SEM of two independent samples. \*  $p < 0.05$  compared with IMQ-induced group only. IMQ, imiquimod; CD: Cudraxanthone D, Dexa: dexamethasone.
