# Supplementary material for: Cudraxanthone D Ameliorates Psoriasis-like Skin Inflammation in an Imiquimod-Induced Mouse Model via Inhibiting the Inflammatory Signaling Pathways
Source: MDPI journal article supplement (doi:10.3390/molecules26196086), 2021-10-08
Supplement: s1 [file s1]

**Table S1. Primer sequences and antibodies.**

| <i>In vitro (Human)</i> |                                                                       |                          |
|-------------------------|-----------------------------------------------------------------------|--------------------------|
| Primer                  | Sequence (5'→3')                                                      | GenBank accession number |
| CCL17                   | F: GTT CGG ACC CCA ACA ACA AG<br>R: TGG CTC CAG TTC AGA CAA GG        | NM_002987.3              |
| IL-1 $\beta$            | F: GCT GAT GGC CCT AAA CAG ATG AA<br>R: TGA AGC CCT TGC TGT AGT GGT G | NM_000576.3              |
| IL-6                    | F: AAA GAG GCA CTG GCA GAA AA<br>R: ATC TGA GGT GCC CAT GCT AC        | NM_001371096.1           |
| IL-8                    | F: GGT GCA GTT TTG CCA AGG AG<br>R: TGC TTG AAG TTT CAC TGG CAT C     | NM_000584.4              |
| GAPDH                   | F: CGA CCA CTT TGT CAA GCT CA<br>R: AGG GGA GAT TCA GTG TCG TG        | NM_002046.7              |
| <i>In vivo (mouse)</i>  |                                                                       |                          |
| Primer                  | Sequence (5'→3')                                                      | GenBank accession number |
| CXCL1                   | F: TGT GGG AGG CTG TGT TTG TA<br>R: ACG AGA CCA GGA GAA ACA GG        | NM_008176.3              |
| IL-25                   | F: CAG GGA CTT GAA TCG GGT C<br>R: TGG TAA AGT GGG ACG GAG T          | NM_080729.3              |
| IL-17A                  | F: TTT AAC TCC CTT GGC GCA AAA<br>R: CTT TCC CTC CGC ATT GAC AC       | NM_010552.3              |
| IL-6                    | F: GAC TGA TGC TGG TGA CAA CC<br>R: TCA TTT CCA CGA TTT CCC AGA G     | NM_0013140541.1          |
| IL-1 $\beta$            | F: ATA ACC TGC TGG TGT GTG AC<br>R: AGG TGC TGA TGT ACC AGT TG        | NM_008361.4              |
| IL-36                   | F: GCT GTG TTG AGA TGG AGG GC<br>R: GAC AGA AGT GGA GCC CTC TA        | NM_027163.4              |
| IL-4                    | F: TCG GCA TTT TGA ACG AGG TC<br>R: GAA AAG CCC GAA AGA GTC TC        | NM_021283.2              |
| CD3                     | F: GCT CCA GGA TTT CTC GGA AGT C<br>R: ATG GCT ACT GCT GTC AGG TCC A  | NM_007648.5              |
| IFN- $\gamma$           | F: TCA AGT GGC ATA GAT GTG GAA GAA<br>R: TGG CTC TGC AGG ATT TTC ATG  | NM_008337.4              |
| Ly6G                    | F: AAC GAA CGTGAT GAACTC CCA<br>R: TAG TGA TGG CTC AAG GTC GC         | NM_033478.3              |
| CD11b                   | F: ATC AAC AAT GTG ACCGTA TGG<br>R: CAT CAT GTC CTT GTA CTG CCG C     | NM_008401.2              |
| TLR7                    | F: GTG ATG CTG TGT GGT TTG TCT GG<br>R: CCT TTG TGT GCT CCT GGA CCT A | NM_001290755.1           |
| GAPDH                   | F: TGC TCC TCC CTG TTC CAG A<br>R: TAC GGC CAA ATC CGT TCA CA         | NM_008084.3              |

CCL, Chemokine (C-C motif) ligand; CXCL, C-X-C motif chemokine; IL, Interleukin; CD, Cluster of differentiation; IFN, interferon; TLR, Toll like receptor; GAPDH, Glyeraldehyde-3-phosphate dehydrogenase.

| Primary antibody              | Size (kDa) | Supplier       | Cat#      | Dilution | Host   |
|-------------------------------|------------|----------------|-----------|----------|--------|
| Phospho-STAT1 <sup>Y701</sup> | 89, 91     | Cell Signaling | 9167S     | 1:1000   | Rabbit |
| STAT1                         | 89, 91     | Cell Signaling | 9172S     | 1:1000   | Rabbit |
| Lamin B1                      | 67         | Santa Cruz     | SC374015  | 1:500    | Mouse  |
| NF-κB p65                     | 65         | Santa Cruz     | SC8008    | 1:500    | Mouse  |
| Phospho-NF-κB p65             | 65         | Cell Signaling | 3033S     | 1:1000   | Rabbit |
| β-actin (C4)                  | 43         | Invitrogen     | MA5-15739 | 1:4000   | Mouse  |
| IκBα                          | 35-41      | Santa Cruz     | SC1643    | 1:500    | Mouse  |
| Secondary antibody            |            | Supplier       | Cat#      | Dilution | Host   |
| Anti-rabbit IgG               |            | Cell Signaling | 7074S     | 1:1000   | Rabbit |
| Anti-mouse IgG                |            | Cell Signaling | 7076S     | 1:2000   | Mouse  |
